# Supplementary material
Source: bioRxiv or medRxiv preprint supplement (https://www.medrxiv.org/highwire/filestream/84573/field_highwire_adjunct_files/2/2020.06.04.20121855-3.pdf)
Supplement: Supplementary file [file 2020.06.04.20121855-3.pdf]

**Supplementary Material 2. PHQ-9 (Patient Health Questionnaire-9) and GAD-7 (General Anxiety Disorder-7) questionnaires and scales**

**PHQ-9 (Patient Health Questionnaire-9) [1]**

---

**How often have you been bothered by the following over the past 2 weeks?**

Little interest or pleasure in doing things?

- Not at all
- Several days
- More than half the days
- Nearly every day

Feeling down, depressed, or hopeless?

- Not at all
- Several days
- More than half the days
- Nearly every day

Trouble falling or staying asleep, or sleeping too much?

- Not at all
- Several days
- More than half the days
- Nearly every day

Feeling tired or having little energy?

- Not at all
- Several days
- More than half the days
- Nearly every day

Poor appetite or overeating?

- Not at all
- Several days
- More than half the days
- Nearly every day

Feeling bad about yourself — or that you are a failure or have let yourself or your family down?

- Not at all
- Several days
- More than half the days
- Nearly every day

Trouble concentrating on things, such as reading the newspaper or watching television?

- Not at all
- Several days
- More than half the days
- Nearly every day

Moving or speaking so slowly that other people could have noticed? Or so fidgety or restless that you have been moving a lot more than usual?

- Not at all
- Several days
- More than half the days
- Nearly every day

Thoughts that you would be better off dead, or thoughts of hurting yourself in some way?

- Not at all
- Several days
- More than half the days
- Nearly every day

////

For each question, the number of points attributed to each answer is as follows:

- Not at all = 0
- Several days = +1
- More than half the days = +2
- Nearly every day = +3

The sum of all points gives the PHQ-9 score, ranging from 0 to 27 points and measuring an increasing severity of depressive symptoms (minimal: 0-4, mild: 5-9, moderate: 10-14, moderately severe: 15-19, severe: 20-27)

### **GAD-7 (General Anxiety Disorder-7) [2]**

---

**How often have you been bothered by the following over the past 2 weeks?**

Feeling nervous, anxious, or on edge

- Not at all
- Several days
- More than half the days
- Nearly every day

Not being able to stop or control worrying

- Not at all
- Several days
- More than half the days
- Nearly every day

Worrying too much about different things

- Not at all
- Several days
- More than half the days
- Nearly every day

Trouble relaxing

- Not at all
- Several days
- More than half the days
- Nearly every day

Being so restless that it's hard to sit still

- Not at all
- Several days
- More than half the days
- Nearly every day

Becoming easily annoyed or irritable

- Not at all
- Several days
- More than half the days
- Nearly every day

Feeling afraid as if something awful might happen

- Not at all
- Several days
- More than half the days
- Nearly every day

////

For each question, the number of points attributed to each answer is as follows:

- Not at all = 0
- Several days = +1
- More than half the days = +2
- Nearly every day = +3

The sum of all points gives the GAD-7 score, ranging from 0 to 21 points and measures an increasing severity of anxiety (minimal: 0-4, mild: 5-9, moderate: 10-14, severe: 15-21).

## REFERENCES

- 1 Kroenke K, Spitzer RL, Williams JBW. The PHQ-9: Validity of a brief depression severity measure. *J Gen Intern Med* 2001;**16**:606–13. doi:10.1046/j.1525-1497.2001.016009606.x
- 2 Spitzer RL, Kroenke K, Williams JBW, *et al.* A Brief Measure for Assessing Generalized Anxiety Disorder: The GAD-7. *Arch Intern Med* 2006;**166**:1092. doi:10.1001/archinte.166.10.1092
